# Supplementary material for: Effects of PAHs on meiofauna from three estuaries with different levels of urbanization in the South Atlantic
Source: PeerJ journal article supplement (doi:10.7717/peerj.14407), 2022-12-02

Summary Figure:

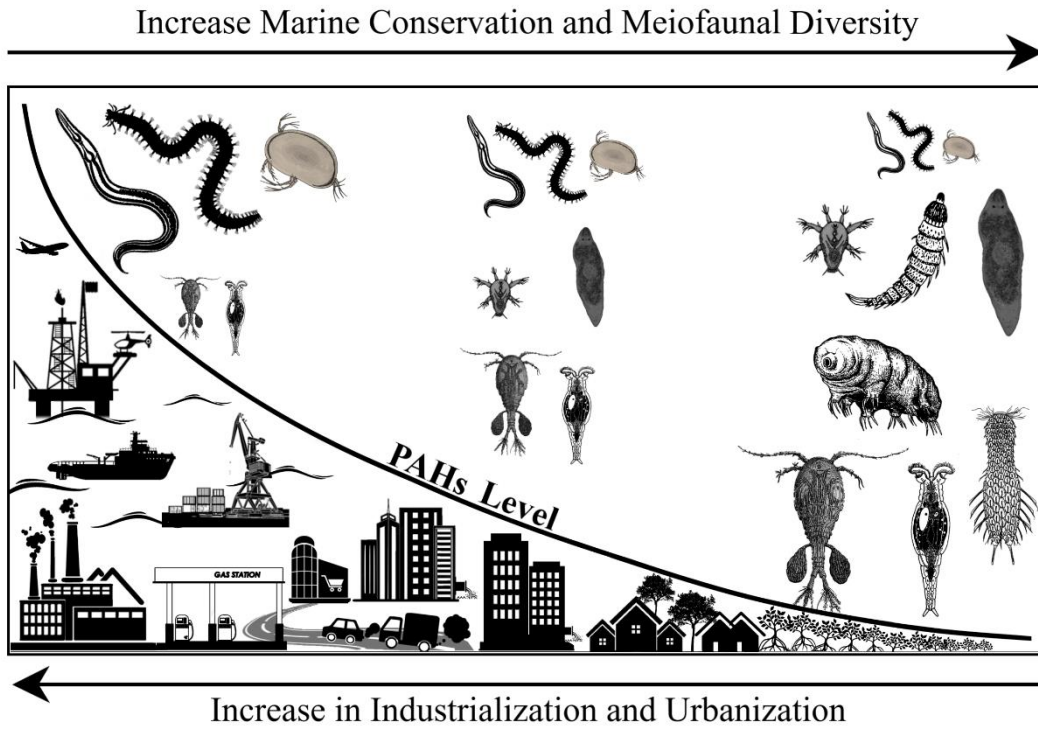

Supplement: Summary_Figure.pdf [file Summary_Figure.pdf]
