# Supplementary material for: Effects of PAHs on meiofauna from three estuaries with different levels of urbanization in the South Atlantic
Source: PeerJ. 2022 Dec 2;10:e14407. doi: 10.7717/peerj.14407 (PMC9744168; doi:10.7717/peerj.14407)
Supplement: Supplemental Information 13 [file peerj-10-14407-s013.xlsx]

## Sheet: Meiofauna Structure
	1	2	3	4	5	6	7	8	9	10	11	12	13	14	15	16	17	18	19	20	21	22	23	24	25	26	27	28	29	30	31	32	33	34	35	36
Nematoda	357	469	61	202	98	146	304	548	250	136	383	632	37	599	507	971	266	229	114	71	38	57	119	118	1025	1170	877	1928	331	410	699	147	571	1463	424	777
Copepoda	117	115	15	22	159	91	10	158	23	33	115	100	1	25	22	52	50	92	133	1	30	18	47	44	12	352	17	77	22	4	2	1	26	45	11	74
Rotifera	18	4	0	1	0	7	0	2	0	0	0	0	0	21	30	0	2	3	1	5	1	3	17	12	7	19	22	7	13	0	1	0	20	37	18	50
Turbellaria	20	16	4	16	7	14	7	12	5	4	11	12	0	0	6	0	0	0	0	0	0	0	2	0	2	4	0	6	1	11	7	0	20	7	18	27
Tardigrada	36	13	5	9	4	44	2	61	6	0	10	8	0	0	1	0	0	0	0	0	0	0	0	0	0	0	0	0	0	0	0	0	0	0	0	0
Gastrotricha	37	24	14	25	21	36	11	34	7	2	9	2	0	0	0	0	0	0	0	0	0	0	0	0	0	0	0	0	0	0	8	0	0	0	3	0
Ostracoda	24	7	0	4	1	1	1	0	0	1	10	4	0	7	5	0	3	0	0	7	7	0	1	0	13	3	8	5	5	1	4	6	51	67	9	28
Halacaroidea	1	3	1	3	1	1	0	9	1	0	7	1	2	0	0	0	0	0	0	2	0	0	0	0	0	0	0	0	0	0	0	0	0	0	1	1
Nauplius	0	5	0	2	0	0	0	14	0	6	66	4	0	3	4	0	0	0	0	0	0	0	0	0	5	9	3	0	0	0	0	0	3	5	1	0
Oligochaeta	0	0	0	1	1	0	2	13	2	0	3	2	0	2	10	3	1	0	0	0	0	0	1	0	7	7	1	4	2	0	3	1	0	10	9	8
Cnidaria	0	0	0	0	0	0	0	0	0	0	0	0	0	0	0	1	0	0	0	0	0	0	0	0	13	2	1	3	0	0	0	0	3	19	0	0
Polychaeta	36	1	0	0	33	0	0	0	0	0	0	0	0	9	13	27	2	3	1	0	16	1	14	4	30	22	11	38	169	32	70	18	183	437	17	709
Amphipoda	0	0	0	0	0	0	0	0	0	0	0	0	0	2	0	0	0	0	0	0	0	0	0	0	0	0	0	0	0	0	0	0	0	0	0	0
Sipuncula	0	0	0	2	0	0	2	20	0	0	3	0	0	0	0	0	0	0	0	0	0	0	0	0	0	0	0	0	0	0	0	0	0	0	0	0
Kinorhyncha	0	0	0	0	0	0	2	0	0	0	0	0	0	0	0	0	0	0	0	0	0	0	0	0	0	0	0	0	0	0	0	0	0	0	0	0
Priapulida	0	0	0	0	0	0	0	0	0	0	0	1	0	0	0	0	0	0	0	0	0	0	0	0	0	0	0	0	0	0	0	0	0	0	0	0
Estuary	GES	GES	GES	GES	GES	GES	GES	GES	GES	GES	GES	GES	TES	TES	TES	TES	TES	TES	TES	TES	TES	TES	TES	TES	CES	CES	CES	CES	CES	CES	CES	CES	CES	CES	CES	CES
Station	1	1	1	1	2	2	2	2	3	3	3	3	1	1	1	1	2	2	2	2	3	3	3	3	1	1	1	1	2	2	2	2	3	3	3	3
Replica	1	2	3	4	1	2	3	4	1	2	3	4	1	2	3	4	1	2	3	4	1	2	3	4	1	2	3	4	1	2	3	4	1	2	3	4

## Sheet: Richness - S
	1	2	3	4	5	6	7	8	9	10	11	12	13	14	15	16	17	18	19	20	21	22	23	24	25	26	27	28	29	30	31	32	33	34	35	36
S	9	10	6	11	9	8	9	10	7	6	10	10	3	8	9	5	6	4	4	5	5	4	7	4	9	9	8	8	7	5	8	5	8	9	10	8
Estuary	GES	GES	GES	GES	GES	GES	GES	GES	GES	GES	GES	GES	TES	TES	TES	TES	TES	TES	TES	TES	TES	TES	TES	TES	CES	CES	CES	CES	CES	CES	CES	CES	CES	CES	CES	CES
Station	1	1	1	1	2	2	2	2	3	3	3	3	1	1	1	1	2	2	2	2	3	3	3	3	1	1	1	1	2	2	2	2	3	3	3	3
Replica	1	2	3	4	1	2	3	4	1	2	3	4	1	2	3	4	1	2	3	4	1	2	3	4	1	2	3	4	1	2	3	4	1	2	3	4

## Sheet: Abundance - N
	1	2	3	4	5	6	7	8	9	10	11	12	13	14	15	16	17	18	19	20	21	22	23	24	25	26	27	28	29	30	31	32	33	34	35	36
N	22.3888	20.8928	10.6066	19.0125	17.2756	17.1506	15.1584	24.3235	13.0425	10.9802	21.9173	18.9261	4.65553	16.377	18.403	12.8631	11.3921	9.61927	8.66354	8.21392	9.44975	7.12354	13.0753	9.14681	19.5952	21.7117	16.4572	19.4888	15.62	11.1136	16.2622	9.10686	20.3584	25.6621	19.2892	23.2935
Estuary	GES	GES	GES	GES	GES	GES	GES	GES	GES	GES	GES	GES	TES	TES	TES	TES	TES	TES	TES	TES	TES	TES	TES	TES	CES	CES	CES	CES	CES	CES	CES	CES	CES	CES	CES	CES
Station	1	1	1	1	2	2	2	2	3	3	3	3	1	1	1	1	2	2	2	2	3	3	3	3	1	1	1	1	2	2	2	2	3	3	3	3
Replica	1	2	3	4	1	2	3	4	1	2	3	4	1	2	3	4	1	2	3	4	1	2	3	4	1	2	3	4	1	2	3	4	1	2	3	4

## Sheet: Evenness - J
	1	2	3	4	5	6	7	8	9	10	11	12	13	14	15	16	17	18	19	20	21	22	23	24	25	26	27	28	29	30	31	32	33	34	35	36
J	0.665615	0.428094	0.661885	0.476284	0.596521	0.703904	0.243077	0.542885	0.322822	0.447535	0.528928	0.27816	0.285927	0.237736	0.315661	0.211987	0.320537	0.499425	0.531603	0.414479	0.795292	0.542471	0.587516	0.638467	0.193865	0.345808	0.168649	0.160454	0.493168	0.266789	0.233496	0.341729	0.522927	0.429204	0.340175	0.542368
Estuary	GES	GES	GES	GES	GES	GES	GES	GES	GES	GES	GES	GES	TES	TES	TES	TES	TES	TES	TES	TES	TES	TES	TES	TES	CES	CES	CES	CES	CES	CES	CES	CES	CES	CES	CES	CES
Station	1	1	1	1	2	2	2	2	3	3	3	3	1	1	1	1	2	2	2	2	3	3	3	3	1	1	1	1	2	2	2	2	3	3	3	3
Replica	1	2	3	4	1	2	3	4	1	2	3	4	1	2	3	4	1	2	3	4	1	2	3	4	1	2	3	4	1	2	3	4	1	2	3	4

## Sheet: Shannon's Diversity - H
	1	2	3	4	5	6	7	8	9	10	11	12	13	14	15	16	17	18	19	20	21	22	23	24	25	26	27	28	29	30	31	32	33	34	35	36
H	2.13714	2.19474	1.74181	2.30986	2.09029	1.99586	2.07872	2.22499	1.8394	1.69607	2.21797	2.1402	1.01556	1.9499	2.09273	1.42778	1.64189	1.2753	1.23331	1.53455	1.56603	1.31385	1.85281	1.33727	2.06801	2.03279	1.91005	1.8948	1.81962	1.47144	1.91475	1.49159	1.98671	2.08102	2.20087	1.95997
Estuary	GES	GES	GES	GES	GES	GES	GES	GES	GES	GES	GES	GES	TES	TES	TES	TES	TES	TES	TES	TES	TES	TES	TES	TES	CES	CES	CES	CES	CES	CES	CES	CES	CES	CES	CES	CES
Station	1	1	1	1	2	2	2	2	3	3	3	3	1	1	1	1	2	2	2	2	3	3	3	3	1	1	1	1	2	2	2	2	3	3	3	3
Replica	1	2	3	4	1	2	3	4	1	2	3	4	1	2	3	4	1	2	3	4	1	2	3	4	1	2	3	4	1	2	3	4	1	2	3	4

## Sheet: PAHs Concentration
	1	2	3	4	5	6	7	8	9	10	11	12	13	14	15	16	17	18	19	20	21	22	23	24	25	26	27	28	29	30	31	32	33	34	35	36
2-Methyl Naphthalene	0.46	0.46	0.46	0.46	0	0	0	0	0	0	0	0	1.29	1.29	1.29	1.29	1.11	1.11	1.11	1.11	0.42	0.42	0.42	0.42	5.5	5.5	5.5	5.5	4.7	4.7	4.7	4.7	7.04	7.04	7.04	7.04
Acenaphthylene	0	0	0	0	0	0	0	0	0	0	0	0	1.46	1.46	1.46	1.46	0.86	0.86	0.86	0.86	0	0	0	0	2.99	2.99	2.99	2.99	2.3	2.3	2.3	2.3	12.86	12.86	12.86	12.86
Acenaphthene	0	0	0	0	0	0	0	0	0	0	0	0	0	0	0	0	0	0	0	0	0	0	0	0	1.13	1.13	1.13	1.13	1.2	1.2	1.2	1.2	1.25	1.25	1.25	1.25
Fluorene	0.39	0.39	0.39	0.39	0	0	0	0	0	0	0	0	0.67	0.67	0.67	0.67	0.8	0.8	0.8	0.8	0	0	0	0	4.81	4.81	4.81	4.81	3.3	3.3	3.3	3.3	7.3	7.3	7.3	7.3
Phenanthreno	0.8	0.8	0.8	0.8	0	0	0	0	0	0	0	0	8.17	8.17	8.17	8.17	5.72	5.72	5.72	5.72	1.24	1.24	1.24	1.24	18.6	18.6	18.6	18.6	15	15	15	15	41.06	41.06	41.06	41.06
Anthracene	0	0	0	0	0	0	0	0	0	0	0	0	1.9	1.9	1.9	1.9	1.55	1.55	1.55	1.55	0	0	0	0	4.89	4.89	4.89	4.89	4.9	4.9	4.9	4.9	14.98	14.98	14.98	14.98
Fluoranthene	0	0	0	0	0	0	0	0	0	0	0	0	31.69	31.69	31.69	31.69	20.69	20.69	20.69	20.69	3.16	3.16	3.16	3.16	48.52	48.52	48.52	48.52	40.6	40.6	40.6	40.6	168.68	168.68	168.68	168.68
Pyrene	0	0	0	0	0	0	0	0	0	0	0	0	31.08	31.08	31.08	31.08	19.94	19.94	19.94	19.94	3.23	3.23	3.23	3.23	52.77	52.77	52.77	52.77	43.5	43.5	43.5	43.5	140.56	140.56	140.56	140.56
Benzo[a]anthracene	0	0	0	0	0	0	0	0	0	0	0	0	27.68	27.68	27.68	27.68	17.51	17.51	17.51	17.51	3.05	3.05	3.05	3.05	33.91	33.91	33.91	33.91	23.1	23.1	23.1	23.1	92.39	92.39	92.39	92.39
Chrysene	0	0	0	0	0	0	0	0	0	0	0	0	19.82	19.82	19.82	19.82	12.59	12.59	12.59	12.59	2.54	2.54	2.54	2.54	38.09	38.09	38.09	38.09	26.8	26.8	26.8	26.8	96.75	96.75	96.75	96.75
Benzo[b]fluoranthene	0	0	0	0	0	0	0	0	0	0	0	0	19.29	19.29	19.29	19.29	18.75	18.75	18.75	18.75	3.63	3.63	3.63	3.63	36.38	36.38	36.38	36.38	32.8	32.8	32.8	32.8	104.59	104.59	104.59	104.59
Benzo[k]fluoranthene	0	0	0	0	0	0	0	0	0	0	0	0	20.01	20.01	20.01	20.01	10.53	10.53	10.53	10.53	2.92	2.92	2.92	2.92	43.93	43.93	43.93	43.93	29.9	29.9	29.9	29.9	99.63	99.63	99.63	99.63
Benzo[a]pyrene	0	0	0	0	0	0	0	0	0	0	0	0	25.92	25.92	25.92	25.92	16.6	16.6	16.6	16.6	3.61	3.61	3.61	3.61	46.68	46.68	46.68	46.68	36.6	36.6	36.6	36.6	135.39	135.39	135.39	135.39
Indeno[1,2,3-cd]pyrene	0	0	0	0	0	0	0	0	0	0	0	0	22.09	22.09	22.09	22.09	14.99	14.99	14.99	14.99	3.64	3.64	3.64	3.64	53.81	53.81	53.81	53.81	45.7	45.7	45.7	45.7	148.62	148.62	148.62	148.62
Dibenz[a,h]anthracene	0	0	0	0	0	0	0	0	0	0	0	0	4.41	4.41	4.41	4.41	3.05	3.05	3.05	3.05	0.7	0.7	0.7	0.7	11.21	11.21	11.21	11.21	5.8	5.8	5.8	5.8	27.22	27.22	27.22	27.22
Benzo[ghi]perylene	0	0	0	0	0	0	0	0	0	0	0	0	14.38	14.38	14.38	14.38	10.42	10.42	10.42	10.42	2.7	2.7	2.7	2.7	42.33	42.33	42.33	42.33	36.7	36.7	36.7	36.7	107.13	107.13	107.13	107.13
Naphthalene	0	0	0	0	0	0	0	0	0	0	0	0	0.94	0.94	0.94	0.94	0.77	0.77	0.77	0.77	0	0	0	0	6.16	6.16	6.16	6.16	6.6	6.6	6.6	6.6	7.78	7.78	7.78	7.78
Estuary	GES	GES	GES	GES	GES	GES	GES	GES	GES	GES	GES	GES	TES	TES	TES	TES	TES	TES	TES	TES	TES	TES	TES	TES	CES	CES	CES	CES	CES	CES	CES	CES	CES	CES	CES	CES
Station	1	1	1	1	2	2	2	2	3	3	3	3	1	1	1	1	2	2	2	2	3	3	3	3	1	1	1	1	2	2	2	2	3	3	3	3
Replica	1	2	3	4	1	2	3	4	1	2	3	4	1	2	3	4	1	2	3	4	1	2	3	4	1	2	3	4	1	2	3	4	1	2	3	4

## Sheet: Environmental Data
	1	2	3	4	5	6	7	8	9	10	11	12	13	14	15	16	17	18	19	20	21	22	23	24	25	26	27	28	29	30	31	32	33	34	35	36
Salinity	30	30	30	30	28	28	28	28	24	24	24	24	36	36	36	36	26	26	26	26	30	30	30	30	33.47	33.47	33.47	33.47	26.22	26.22	26.22	26.22	23.03	23.03	23.03	23.03
DO	4.55	4.55	4.55	4.55	5.01	5.01	5.01	5.01	3.78	3.78	3.78	3.78	4.65	4.65	4.65	4.65	5.98	5.98	5.98	5.98	5.66	5.66	5.66	5.66	21	21	21	21	16	16	16	16	16	16	16	16
pH	8.43	8.43	8.43	8.43	8.44	8.44	8.44	8.44	8.34	8.34	8.34	8.34	8.5	8.5	8.5	8.5	8.34	8.34	8.34	8.34	8.35	8.35	8.35	8.35	5.84	5.84	5.84	5.84	5.81	5.81	5.81	5.81	5.79	5.79	5.79	5.79
OM	1.36687	1.36687	1.36687	1.36687	1.87177	1.87177	1.87177	1.87177	2.37668	2.37668	2.37668	2.37668	7.75547	7.75547	7.75547	7.75547	7.81955	7.81955	7.81955	7.81955	5.05319	5.05319	5.05319	5.05319	7.71084	7.71084	7.71084	7.71084	11.3106	11.3106	11.3106	11.3106	16.2791	16.2791	16.2791	16.2791
Temp.	29	29	29	29	29.2	29.2	29.2	29.2	29.2	29.2	29.2	29.2	29	29	29	29	29.1	29.1	29.1	29.1	29	29	29	29	29.2	29.2	29.2	29.2	29.3	29.3	29.3	29.3	29.9	29.9	29.9	29.9
Gravel	0.322451	0.322451	0.322451	0.322451	0.0160235	0.0160235	0.0160235	0.0160235	5.7285	5.7285	5.7285	5.7285	1.69343	1.69343	1.69343	1.69343	0.860366	0.860366	0.860366	0.860366	12.7867	12.7867	12.7867	12.7867	1.73302	1.73302	1.73302	1.73302	6.13313	6.13313	6.13313	6.13313	19.7329	19.7329	19.7329	19.7329
Sand	98.5364	98.5364	98.5364	98.5364	98.801	98.801	98.801	98.801	90.6964	90.6964	90.6964	90.6964	80.4445	80.4445	80.4445	80.4445	89.4179	89.4179	89.4179	89.4179	81.8987	81.8987	81.8987	81.8987	65.7483	65.7483	65.7483	65.7483	84.3347	84.3347	84.3347	84.3347	42.0242	42.0242	42.0242	42.0242
VCSand	2.08568	2.08568	2.08568	2.08568	0.100295	0.100295	0.100295	0.100295	4.16049	4.16049	4.16049	4.16049	4.6602	4.6602	4.6602	4.6602	2.17334	2.17334	2.17334	2.17334	10.4969	10.4969	10.4969	10.4969	1.89178	1.89178	1.89178	1.89178	11.3836	11.3836	11.3836	11.3836	4.42705	4.42705	4.42705	4.42705
CSand	20.3499	20.3499	20.3499	20.3499	0.83322	0.83322	0.83322	0.83322	27.031	27.031	27.031	27.031	8.2821	8.2821	8.2821	8.2821	9.4609	9.4609	9.4609	9.4609	23.5007	23.5007	23.5007	23.5007	9.9642	9.9642	9.9642	9.9642	24.6604	24.6604	24.6604	24.6604	6.30525	6.30525	6.30525	6.30525
MSand	56.8883	56.8883	56.8883	56.8883	23.2945	23.2945	23.2945	23.2945	49.4878	49.4878	49.4878	49.4878	15.6238	15.6238	15.6238	15.6238	15.2127	15.2127	15.2127	15.2127	28.3062	28.3062	28.3062	28.3062	17.0854	17.0854	17.0854	17.0854	28.8746	28.8746	28.8746	28.8746	7.756	7.756	7.756	7.756
FSand	18.7203	18.7203	18.7203	18.7203	73.8083	73.8083	73.8083	73.8083	9.35317	9.35317	9.35317	9.35317	29.2895	29.2895	29.2895	29.2895	37.3004	37.3004	37.3004	37.3004	16.8556	16.8556	16.8556	16.8556	18.5334	18.5334	18.5334	18.5334	14.3194	14.3194	14.3194	14.3194	12.4538	12.4538	12.4538	12.4538
VFSand	0.492199	0.492199	0.492199	0.492199	0.764616	0.764616	0.764616	0.764616	0.663975	0.663975	0.663975	0.663975	22.589	22.589	22.589	22.589	25.2706	25.2706	25.2706	25.2706	2.7393	2.7393	2.7393	2.7393	18.2735	18.2735	18.2735	18.2735	5.0967	5.0967	5.0967	5.0967	11.0821	11.0821	11.0821	11.0821
Silt	1.1412	1.1412	1.1412	1.1412	1.18301	1.18301	1.18301	1.18301	3.57506	3.57506	3.57506	3.57506	17.8621	17.8621	17.8621	17.8621	9.7217	9.7217	9.7217	9.7217	5.31458	5.31458	5.31458	5.31458	32.5187	32.5187	32.5187	32.5187	9.53221	9.53221	9.53221	9.53221	38.2429	38.2429	38.2429	38.2429
Estuary	GES	GES	GES	GES	GES	GES	GES	GES	GES	GES	GES	GES	TES	TES	TES	TES	TES	TES	TES	TES	TES	TES	TES	TES	CES	CES	CES	CES	CES	CES	CES	CES	CES	CES	CES	CES
Station	1	1	1	1	2	2	2	2	3	3	3	3	1	1	1	1	2	2	2	2	3	3	3	3	1	1	1	1	2	2	2	2	3	3	3	3
Replica	1	2	3	4	1	2	3	4	1	2	3	4	1	2	3	4	1	2	3	4	1	2	3	4	1	2	3	4	1	2	3	4	1	2	3	4
